# Supplementary material for: Enhanced Fenton-catalytic efficiency by highly accessible active sites on dandelion-like copper–aluminum–silica nanospheres for water purification
Source: Royal Society of Chemistry journal article supplement (doi:10.1039/c6ta02276f), 2016-01-01
Supplement: c6ta02276f1.pdf [file c6ta02276f1.pdf]

1  
2  
3  
4  
5  
6  
7  
8  
9  
10  
11  
12  
13  
14  
15  
16  
17  
18  
19  
20  
21  
22  
23  
24  
25

Electronic Supplementary Information (ESI)

**Enhanced Fenton-catalytic efficiency by highly accessible active sites on dandelion-like copper-aluminum-silica nanospheres for water purification**

*Lai Lyu<sup>ab</sup>, Lili Zhang<sup>a</sup>, Chun Hu<sup>\*ab</sup>, and Min Yang<sup>ab</sup>*

<sup>a</sup>Key Laboratory of Drinking Water Science and Technology, Research Center for Eco-Environmental Sciences, Chinese Academy of Sciences, Beijing 100085, China.

<sup>b</sup>University of Chinese Academy of Sciences, Beijing 100049, China.

\* Corresponding author. Tel.: +86 10 62849628; fax: +86 10 62923541

E-mail address: [huchun@rcees.ac.cn](mailto:huchun@rcees.ac.cn) (C. Hu)

The Journal: **Journal of Materials Chemistry A**

Pages: 15, Figures: 10, Tables: 2

26  
27  
28  
29  
30  
31

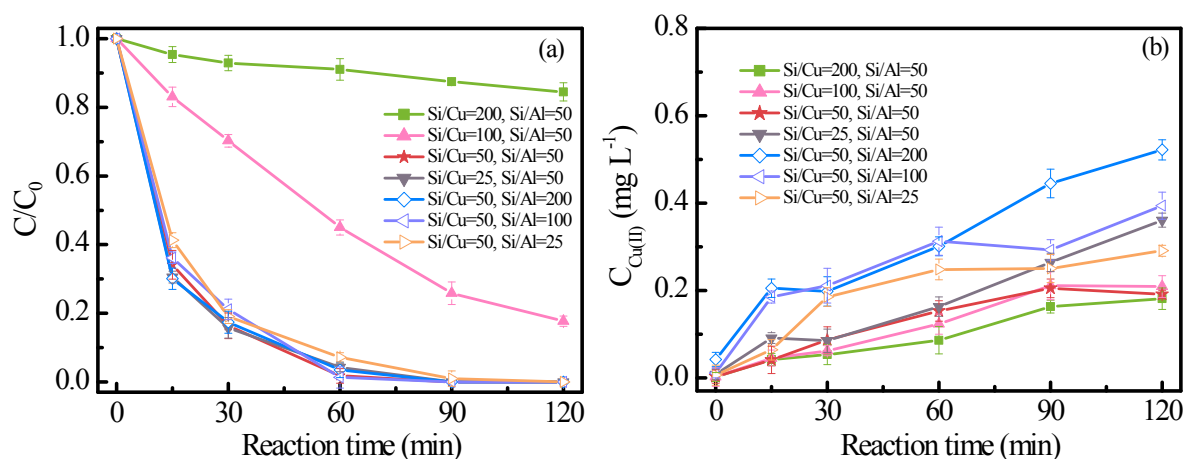

32  
33

34 **Fig. S1.** Effect of the Si/Cu and Si/Al mole ratios of DCAS Ns on BPA degradation with  
35 H<sub>2</sub>O<sub>2</sub>: a) BPA degradation curves and b) concentrations of the released Cu in the  
36 corresponding suspensions. Reaction conditions: initial pH 7, initial BPA concentration 23  
37 mg L<sup>-1</sup>, initial H<sub>2</sub>O<sub>2</sub> concentration 10 mM and catalyst concentration 1.0 g L<sup>-1</sup>.

38  
39  
40  
41  
42  
43  
44  
45

46

47

48

49

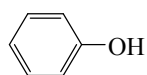

phenol

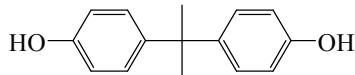

bisphenol A

50

51

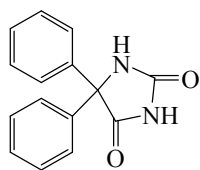

phenytoin

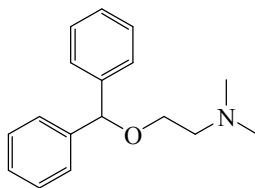

diphenhydramine

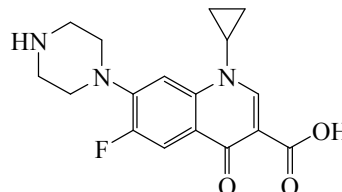

ciprofloxacin

52

53

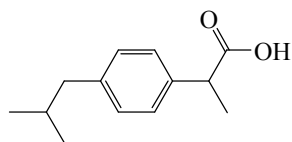

ibuprofen

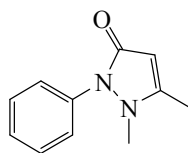

antipyrine

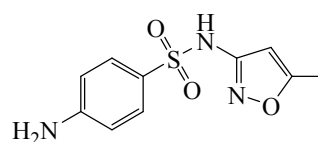

sulfamethoxazole

54

55

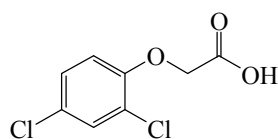

2,4-dichlorophenoxyacetic acid

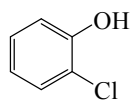

2-chlorophenol

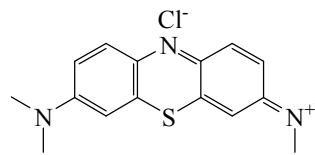

methylene blue

56

57

58 **Fig. S2.** Structures of phenol, bisphenol A, phenytoin, diphenhydramine, ciprofloxacin,

59 ibuprofen, antipyrine, sulfamethoxazole, 2,4-dichlorophenoxyacetic acid, 2-chlorophenol and

60 methylene blue.

61

62

63

64

65 **Optimal Reaction Conditions.** Because the catalyst concentration and  $\text{H}_2\text{O}_2$  dosage can  
 66 influence the Fenton reaction, the optimal reaction conditions were determined prior to the  
 67 main experiments. As shown in Fig. S3a, the reaction rate increased with an increasing  
 68 amount of DCAS Ns from  $0.2$  to  $1.0 \text{ g L}^{-1}$  and then slightly decreased. The enhancement in  
 69 the removal rate may be due to the increasing amount of active sites for the formation of  $\bullet\text{OH}$ ,  
 70 and the slight decrease in the BPA removal may be due to the agglomeration of particles and  
 71 scavenging of  $\bullet\text{OH}$  by excess  $\text{Cu}^+$ .<sup>1</sup> Therefore,  $1.0 \text{ g L}^{-1}$  of catalyst was the optimum dosage  
 72 and used in all of the experiments unless otherwise specified. As shown in Fig. S3b, the  
 73 degradation rate increased as the  $\text{H}_2\text{O}_2$  dosage increased from  $0$  to  $15 \text{ mM}$  because  $\text{H}_2\text{O}_2$  is the  
 74 precursor in the reaction with  $\text{Cu}^+$  to generate  $\bullet\text{OH}$ . However, at a higher dosage ( $20 \text{ mM}$ ), the  
 75 degradation rate decreased, which is most likely due to the scavenging effect of  $\bullet\text{OH}$  and  
 76 inhibition of copper corrosion by  $\text{H}_2\text{O}_2$ .<sup>2</sup> Based on the activity and economy,  $10 \text{ mM H}_2\text{O}_2$   
 77 was selected and used in all of the experiments unless otherwise specified.

78

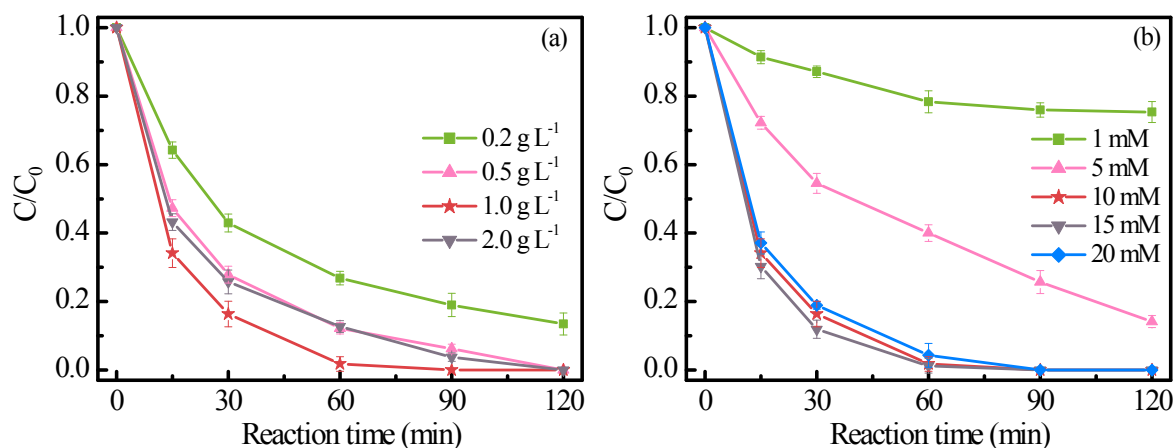

79

80

81 **Fig. S3.** Effect of a) catalyst concentration and b)  $\text{H}_2\text{O}_2$  concentration on BPA degradation in  
 82 the DCAS Ns suspension. Reaction conditions: initial pH 7, initial BPA concentration  $23 \text{ mg}$   
 83  $\text{L}^{-1}$ , initial  $\text{H}_2\text{O}_2$  concentration  $10 \text{ mM}$  for a) and catalyst concentration  $1.0 \text{ g L}^{-1}$  for b).

84 **GC-MS Analysis.** GC-MS analysis was carried out on an Agilent 6890GC/5973MSD with a  
85 DB-5 MScapillary column. The GC oven temperature program was as follows: 60 °C held for  
86 2 min followed by linear temperature gradient of 6 °C min<sup>-1</sup> to 280°C, which was held for 5  
87 min. The samples for GC-MS analysis were prepared using the following procedure. The  
88 suspension at a reaction time of 15 min was filtered, and the solid particles and the solution  
89 were collected and evaporated using a freeze-drying method. Then, the residue was dissolved  
90 in 2 mL of dichloromethane. After the solvent was dehydrated by anhydrous sodium sulfate,  
91 trimethylsilylation was carried out at 60 °C for 30 min using 0.2 mL of BSTFA (N,O-  
92 bis(trimethylsilyl)trifluoroacetamide). The precipitate was separated by centrifugation prior to  
93 chromatographic analysis.

94

95 **ESR measurements:** ESR spectra were recorded on a Bruker A300-10/12 ESR spectrometer  
96 using BMPO as a spin trap agent at room temperature. The samples for ESR measurement  
97 were prepared using the following procedure. 1g L<sup>-1</sup> catalyst was added to a 0.1 mM BPA  
98 aqueous solution. The suspension was stirred at room temperature for approximately 30 min  
99 to establish adsorption/desorption equilibrium between the pollutant and the catalyst. Then, 10  
100 mM H<sub>2</sub>O<sub>2</sub> was added to the above suspension under continuous stirring. 25 mL of the  
101 suspension were collected at the adsorption/desorption equilibrium point as well as at 15 min  
102 after adding H<sub>2</sub>O<sub>2</sub> followed by filtration. The solid particles were collected and dried at 45 °C  
103 to form the powder samples. 0.01 g of the prepared powder sample was added to 1 mL of  
104 water. Then, 100 μL of the above suspension, 10 μL of BMPO (250 mM) and 10 μL of H<sub>2</sub>O<sub>2</sub>  
105 (30%, w/w) were mixed and held for 5 min for measurement.

106

107

108

109

110

111

112

113

114

115

116

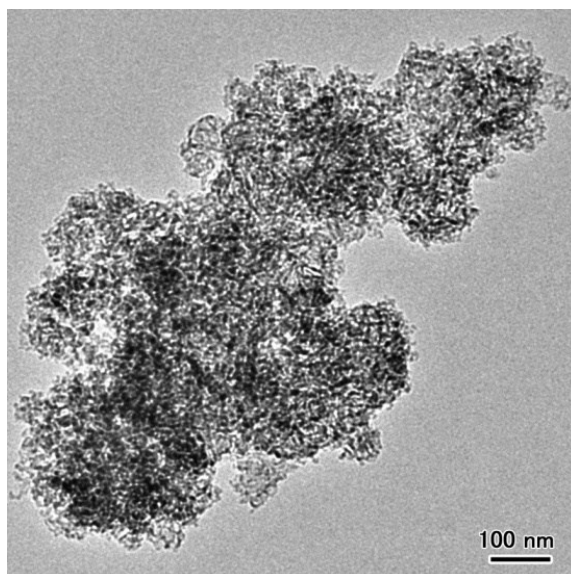

117

118

119 **Fig. S4.** HRTEM image of DCAS Ns with Si/Cu=50 and Si/Al=25.

120

121

122

123

124

125

126

127

128  
129  
130  
131

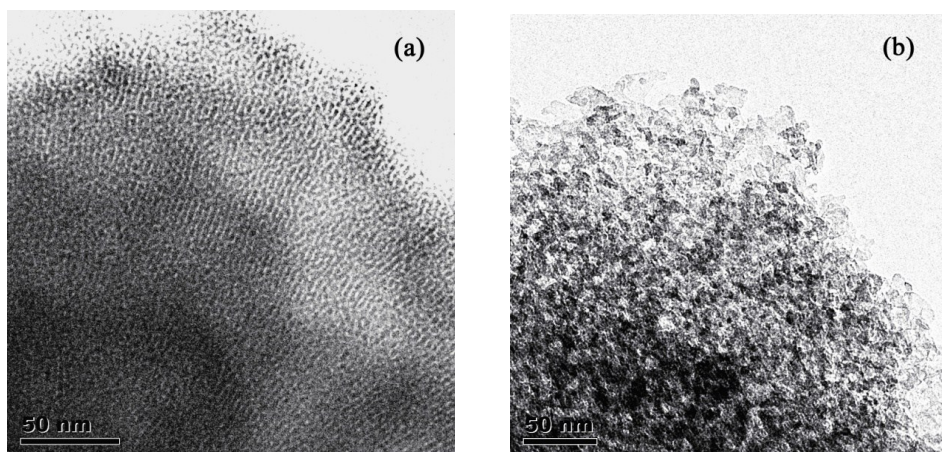

132

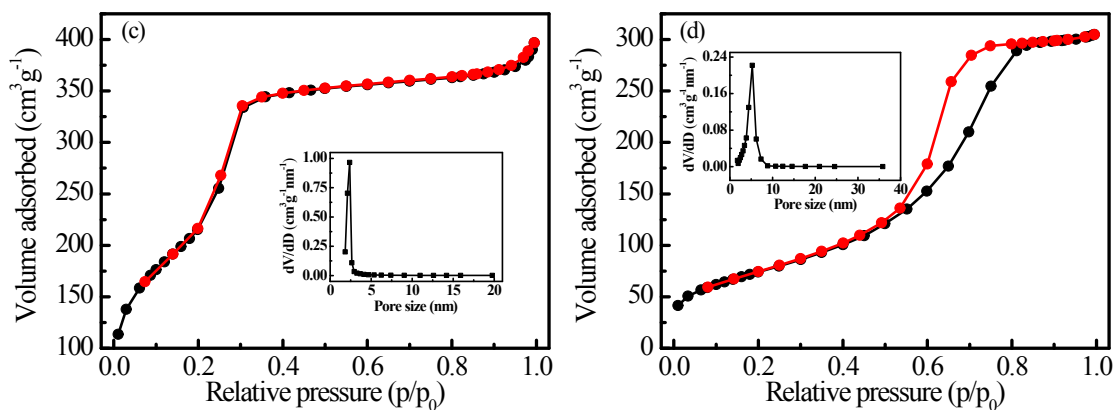

133  
134

135 **Fig. S5.** HRTEM images of a) Cu-MCM-41 and b) Cu- $\gamma$ -Al<sub>2</sub>O<sub>3</sub>; N<sub>2</sub> adsorption-desorption  
136 isotherms for c) Cu-MCM-41 and d) Cu- $\gamma$ -Al<sub>2</sub>O<sub>3</sub>. Inset shows the corresponding BJH pore  
137 size distribution.

138  
139  
140  
141  
142

143  
144  
145  
146  
147  
148  
149

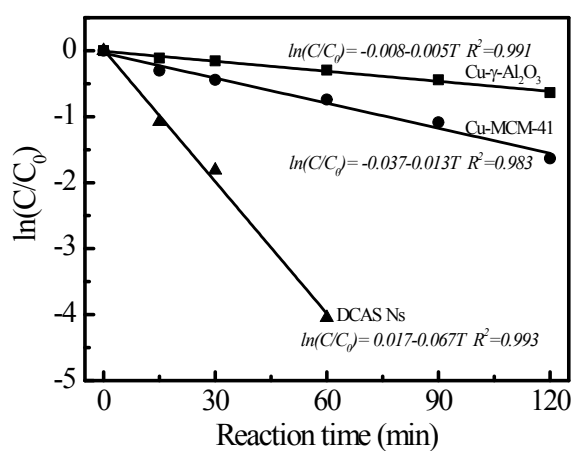

150  
151  
152 **Fig. S6.** The kinetic curves of BPA degradation in various suspensions. Reaction conditions:  
153 initial pH 7, initial BPA concentration 23 mg L<sup>-1</sup>, initial H<sub>2</sub>O<sub>2</sub> concentration 10 mM and  
154 catalyst concentration 1.0 g L<sup>-1</sup>.  
155  
156  
157  
158  
159  
160  
161



162  
163  
164  
165  
166  
167  
168

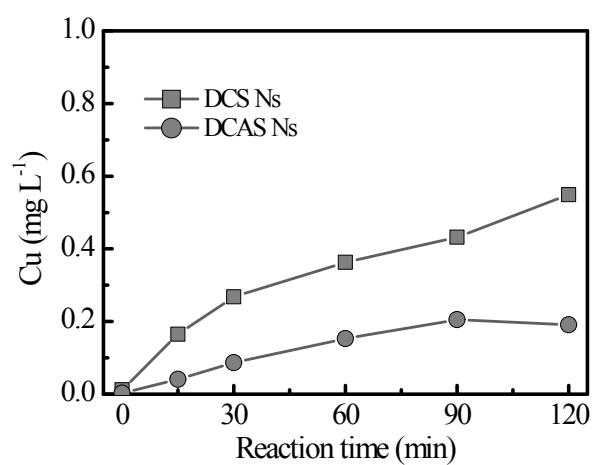

169  
170  
171  
172  
173  
174  
175  
176  
177  
178  
179  
180

**Fig. S7.** The concentration curves of the residual Cu in the solutions of DCS Ns and DCAS Ns during the Fenton process.

181  
182  
183  
184  
185  
186  
187

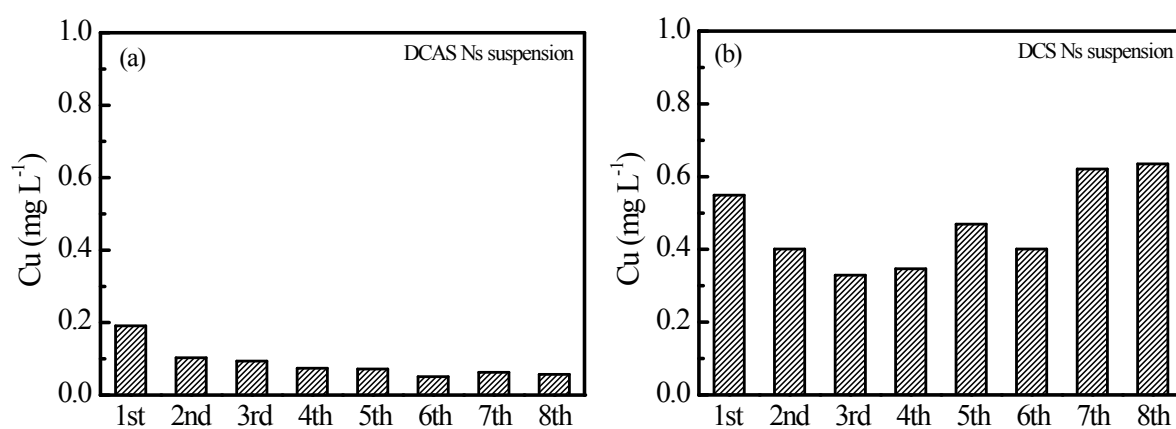

188  
189

190 **Fig. S8.** The concentrations of the residual Cu in the solutions of a) DCAS Ns and b) DCS Ns  
191 after each Fenton reaction cycle.

192  
193  
194  
195  
196  
197  
198  
199  
200  
201

202

203

204

205

206

207

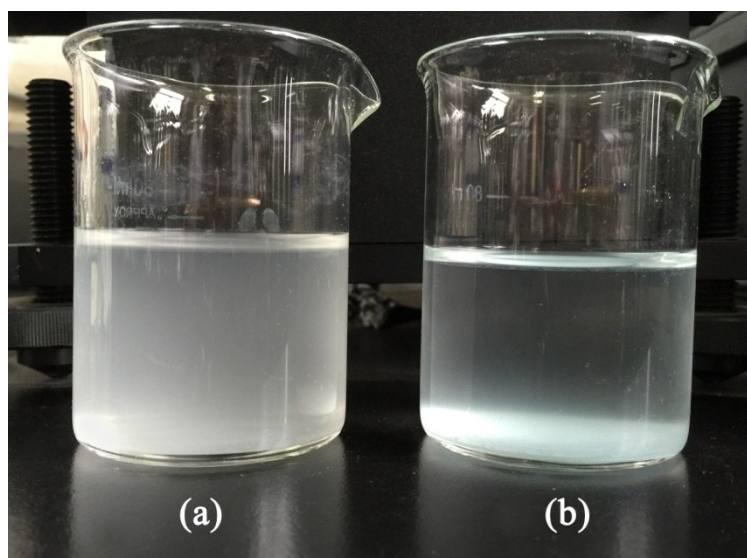

208

209

210 **Fig. S9.** Reaction solutions of a) DCAS Ns and b) Cu- $\gamma$ -Al<sub>2</sub>O<sub>3</sub> without any agitation.

211

212

213

214

215

216

217

218

219

220

221  
222  
223  
224  
225  
226

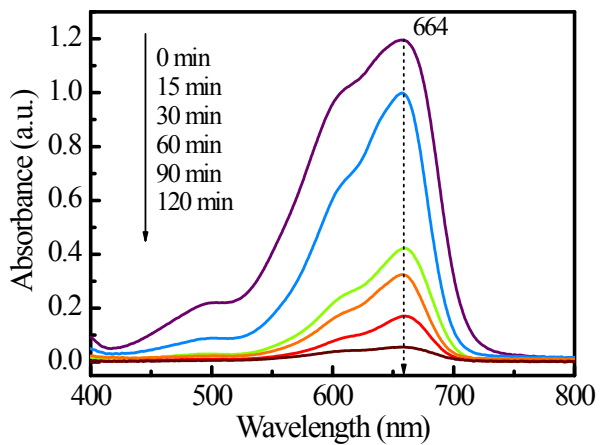

227  
228  
229 **Fig. S10.** UV-Vis DRS spectral changes of methylene blue on the surface of DCAS Ns  
230 recorded for DCAS Ns as a function of reaction time.  
231  
232  
233  
234  
235  
236  
237  
238

239 **Calculation of the Utilization Efficiency of H<sub>2</sub>O<sub>2</sub>.** The complete mineralization of one mole  
 240 of BPA will theoretically consume 36 moles of H<sub>2</sub>O<sub>2</sub> (eqs. S1).

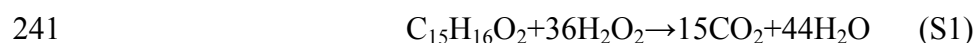

242 The utilization efficiency of H<sub>2</sub>O<sub>2</sub> ( $\eta$ ) is defined as the ratio of the stoichiometric H<sub>2</sub>O<sub>2</sub>  
 243 consumption ( $[\Delta\text{H}_2\text{O}_2]_S$ ) for the mineralization of pollutants to the actual H<sub>2</sub>O<sub>2</sub> consumption  
 244 ( $[\Delta\text{H}_2\text{O}_2]_A$ ) in the Fenton-like reaction<sup>2</sup> and is expressed in eq. S2:

245 
$$\eta = [\Delta\text{H}_2\text{O}_2]_S / [\Delta\text{H}_2\text{O}_2]_A \quad (\text{S2})$$

246 By measuring the TOC change in the pollutant solutions, the amounts of the mineralized  
 247 contaminants were obtained, and the value of  $[\Delta\text{H}_2\text{O}_2]_S$  was calculated. The actual H<sub>2</sub>O<sub>2</sub>  
 248 consumption ( $[\Delta\text{H}_2\text{O}_2]_A$ ) at different reaction times was measured using the DPD method.  
 249 The detailed data for  $[\Delta\text{H}_2\text{O}_2]_A$  and  $[\Delta\text{H}_2\text{O}_2]_S$  are presented in Table S1.

250

251 **Table S1.** Actual H<sub>2</sub>O<sub>2</sub> consumption ( $[\Delta\text{H}_2\text{O}_2]_A$ ) and stoichiometric H<sub>2</sub>O<sub>2</sub> consumption  
 252 ( $[\Delta\text{H}_2\text{O}_2]_S$ ) for mineralizing BPA during the Fenton reaction.

| Reaction time/min | BPA (23 mg L <sup>-1</sup> )               |                                            |
|-------------------|--------------------------------------------|--------------------------------------------|
|                   | $[\Delta\text{H}_2\text{O}_2]_A/\text{mM}$ | $[\Delta\text{H}_2\text{O}_2]_S/\text{mM}$ |
| 0                 | 0                                          | 0                                          |
| 15                | 0.65                                       | 0.60                                       |
| 30                | 1.27                                       | 1.12                                       |
| 60                | 1.79                                       | 1.55                                       |
| 90                | 2.29                                       | 1.84                                       |
| 120               | 2.96                                       | 2.19                                       |
| 180               | 3.59                                       | 2.47                                       |

253

254

255 **Table S2.** Main products during the Fenton catalytic degradation of BPA in the DCAS Ns  
 256 suspension at 15 min, as detected by GC-MS.

| Retention time/min                      | Product                   | Molecular structure                                                                   |
|-----------------------------------------|---------------------------|---------------------------------------------------------------------------------------|
| Main products on the surface of DCAS Ns |                           |                                                                                       |
| 6.61                                    | ethylene glycol           | 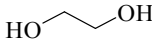   |
| 8.33                                    | lactic acid               |    |
| 13.47                                   | glycerine                 |    |
| 13.84                                   | 4-isopropylphenol         |    |
| 14.17                                   | 4-hydroxybenzoic acid     |  |
| 15.40                                   | maleic acid               |  |
| 16.25                                   | hydroquinone              |  |
| 17.78                                   | 2,4-dihydroxybenzoic acid |  |
| 17.93                                   | 4-hydroxyacetophenone     |  |
| 33.76                                   | bisphenol A               |  |
| Main products in the aqueous solution   |                           |                                                                                       |
| 6.58                                    | ethylene glycol           |  |
| 7.62                                    | propyl alcohol            |  |

|       |               |                                                                                     |
|-------|---------------|-------------------------------------------------------------------------------------|
| 8.31  | lactic acid   | 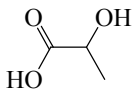 |
| 8.52  | isopropanol   |  |
| 8.71  | glycolic acid |  |
| 11.20 | isobutanol    |  |
| 13.47 | glycerine     |  |
| 33.76 | bisphenol A   |  |

---

257

## 258 References

- 259 1. L. J. Xu, J. L. Wang, *Environ. Sci. Technol.*, 2012, **46**, 10145–10153.
- 260 2. W. Luo, L. H. Zhu, N. Wang, H. Q. Tang, M. J. Cao, Y. B. She, *Environ. Sci. Technol.*,
- 261 2010, **44**, 1786–1791.
